# Supplementary material for: Molecular profiles and tumor mutational burden analysis in Chinese patients with gynecologic cancers
Source: PubMed Central journal article supplement (PMC5997642; doi:10.1038/s41598-018-25583-6), 2018-06-12
Supplement: 41598_2018_25583_MOESM1_ESM.pdf [file 41598_2018_25583_MOESM1_ESM.pdf]

# **Molecular profiles and tumor mutational burden analysis in Chinese patients with gynecologic cancers**

Min Wang, Wensheng Fan, Mingxia Ye, Chen Tian, Lili Zhao, Jianfei Wang, Wenbo Han, Wen Yang, Chenglei Gu, Mingxia Li, Zhe Zhang, Yongjun Wang, Henghui Zhang, Yuanguang Meng.

**Supplementary Table S1.** Cancer related gene list.

**A**

|         |            |         |           |        |              |            |
|---------|------------|---------|-----------|--------|--------------|------------|
| ABALON  | ABCA1      | ABCA3   | ABCB1     | ABCB4  | ABCB6        | ABCB11     |
| ABCC1   | ABCC2      | ABCC3   | ABCC4     | ABCC5  | ABCC6        | ABCC9      |
| ABCC11  | ABCG1      | ABCG2   | ABHD18    | ABL1   | ACE          | ACHE       |
| ACO1    | ACP5       | ACPP    | ACSM2A    | ACSS2  | ACTA2        | ACTB       |
| ACTG1   | ACTR8      | ACVR2B  | ACYP2     | ADAM22 | ADAMTSL4-AS1 | ADCY2      |
| ADCY10  | ADD1       | ADGRB3  | ADH1A     | ADH1B  | ADH1C        | ADH7       |
| ADIPOQ  | ADIPOQ-AS1 | ADRA2B  | ADRA2C    | ADRB1  | ADRB2        | ADRB3      |
| AFMID   | AGO1       | AGO2    | AGT       | AGTR1  | AGTRAP       | AGXT       |
| AHR     | AKAP9      | AKNA    | AKR1C2    | AKR1C3 | AKT1         | AKT2       |
| ALB     | ALDH1A1    | ALDH3A1 | ALDH5A1   | ALK    | ALOX12       | ALOX12-AS1 |
| ANK1    | ANKK1      | ANTXR2  | ANXA11    | AOC1   | AOX1         | APC        |
| APCS    | APEX1      | APOA1   | APOA1-AS  | APOA4  | APOA5        | APOB       |
| APOBEC2 | APOC3      | APOE    | APOH      | AQP2   | AQP9         | AR         |
| ARAF    | AREG       | ARHGEF4 | ARHGEF10  | ARID1A | ARID5B       | ARNT       |
| ARRDC3  | ART3       | ASH1L   | ASH1L-AS1 | ASS1   | ATG5         | ATIC       |
| ATM     | ATP7A      | ATP7B   | ATR       | ATXN2L | AURKA        | AXIN2      |
| AZGP1   | AZU1       |         |           |        |              |            |

**B**

|            |          |       |       |        |         |       |
|------------|----------|-------|-------|--------|---------|-------|
| B2M        | BAIAP2L1 | BAP1  | BAZ2B | BCAT1  | BCHE    | BCL2  |
| BCL2L1     | BCL2L11  | BCOR  | BCR   | BDNF   | BDNF-AS | BGLAP |
| BIVM-ERCC5 | BLMH     | BMP7  | BMX   | BRAF   | BRCA1   | BRCA2 |
| BRD2       | BRD4     | BRWD1 | BTK   | BTN3A1 |         |       |

**C**

|             |         |         |            |          |           |           |
|-------------|---------|---------|------------|----------|-----------|-----------|
| C2          | C5ORF22 | C8ORF34 | C10ORF11   | C10ORF55 | C11ORF65  | C20ORF194 |
| CA2         | CA4     | CA12    | CA13       | CA14     | CACNA2D3  | CALM3     |
| CAMK1       | CAMK2A  | CAMK4   | CANT1      | CAPG     | CARD16    | CARS      |
| CARTPT      | CASC8   | CASP1   | CASP3      | CASP7    | CASP9     | CAT       |
| CBL         | CBR1    | CBR3    | CBR3-AS1   | CBS      | CBSL      | CCAT2     |
| CCDC6       | CCDC159 | CCL1    | CCND1      | CCND2    | CCND3     | CCNE1     |
| CCNH        | CCNY    | CD1D    | CD3EAP     | CD14     | CD28      | CD40LG    |
| CD47        | CD55    | CD74    | CD180      | CD274    | CDA       | CDC20B    |
| CDH1        | CDK2    | CDK4    | CDK6       | CDK7     | CDK8      | CDKN1A    |
| CDKN1B      | CDKN2A  | CDKN2B  | CDKN2B-AS1 | CDKN2C   | CEACAM22P | CEP89     |
| CES2        | CFTR    | CHAT    | CHEK2      | CHRNA3   | CHRNA5    | CHST3     |
| CHURC1-FNTB | CLCN6   | CLDN34  | CLIC1      | CLIP1    | CLK3      | CLTC      |
| CMPK1       | CMTR1   | CNOT1   | CNR1       | COL1A1   | COL1A2    | COL4A1    |
| COLEC10     | COMT    | CPA1    | CPA2       | CPA4     | CPB2      | CPB2-AS1  |
| CRABP2      | CRAT    | CREBBP  | CRP        | CRYZ     | CSDE1     | CSF1R     |
| CSF2RB      | CSF3R   | CSMD3   | CSNK2A1    | CSPG4    | CTLA4     | CTNNB1    |
| CTSA        | CTSL    | CTSS    | CXCL8      | CXCL12   | CXCR2     | CXXC4     |
| CYBA        | CYP1A1  | CYP1A2  | CYP1B1     | CYP2A6   | CYP2B6    | CYP2C8    |

|         |         |         |         |        |        |        |
|---------|---------|---------|---------|--------|--------|--------|
| CYP2C19 | CYP2D6  | CYP2E1  | CYP2R1  | CYP3A4 | CYP3A5 | CYP4B1 |
| CYP4F2  | CYP19A1 | CYP24A1 | CYP46A1 |        |        |        |

### D

|       |       |        |          |        |       |        |
|-------|-------|--------|----------|--------|-------|--------|
| DAPK1 | DAZL  | DCBLD1 | DCK      | DCP1B  | DCTD  | DCTN1  |
| DDR1  | DDR2  | DDX6   | DDX53    | DEAR   | DERL3 | DGKI   |
| DHFR  | DLG4  | DLG5   | DLGAP1   | DNMT3A | DOCK4 | DOT1L  |
| DPEP1 | DPP4  | DPYD   | DPYD-AS1 | DPYS   | DRD2  | DROSHA |
| DSCAM | DTYMK |        |          |        |       |        |

### E

|       |        |        |        |       |          |       |
|-------|--------|--------|--------|-------|----------|-------|
| E2F7  | ECT2L  | EFNB2  | EGF    | EGFR  | EGFR-AS1 | EGLN3 |
| EIF3A | EIF4E2 | EML4   | ENOSF1 | EPAS1 | EPHA2    | EPHA3 |
| EPHA4 | EPHA5  | EPHA6  | EPHX1  | EPRS  | ERAP2    | ERBB2 |
| ERBB3 | ERBB4  | ERC1   | ERCC1  | ERCC2 | ERCC3    | ERCC4 |
| ERCC5 | ERCC6  | EREG   | ERG    | ERP44 | ESR1     | ESR2  |
| ESRP1 | ETF1   | ETFRF1 | ETV1   | ETV4  | ETV5     | ETV6  |
| EVI2A | EXO1   | EZH2   | EZR    |       |          |       |

### F

|        |       |       |       |         |         |        |
|--------|-------|-------|-------|---------|---------|--------|
| F2     | F10   | FAAH  | FABP1 | FAM131B | FAM212B | FANCA  |
| FANCC  | FAP   | FARS2 | FAT1  | FBXW7   | FCGR2A  | FCGR3A |
| FCHSD1 | FCN1  | FCN2  | FDPS  | FECH    | FGD4    | FGF3   |
| FGF4   | FGFR1 | FGFR2 | FGFR3 | FGFR4   | FIBCD1  | FKBP4  |
| FKBP5  | FLCN  | FLT1  | FLT3  | FLT4    | FMO2    | FMO3   |
| FN1    | FNTA  | FOLH1 | FOLR2 | FOLR3   | FOXA1   | FRS2   |
| FSTL5  | FTO   | FZD3  |       |         |         |        |

### G

|         |        |        |       |       |         |          |
|---------|--------|--------|-------|-------|---------|----------|
| GABBR1  | GABBR2 | GAK    | GALE  | GALNS | GALNT10 | GALNT14  |
| GALNT18 | GAPDH  | GARS   | GATA3 | GATA4 | GATM    | GCKR     |
| GDNF    | GEMIN4 | GGCT   | GGH   | GIPR  | GLP1R   | GLRB     |
| GLRX    | GLRX2  | GNA11  | GNAI1 | GNAQ  | GNAS    | GNAS-AS1 |
| GNB3    | GNL3   | GOLGA5 | GOPC  | GP1BA | GPC1    | GPX5     |
| GRIK1   | GRIN2B | GRK5   | GSG2  | GSR   | GSS     | GSTA1    |
| GSTA2   | GSTA3  | GSTA5  | GSTM3 | GSTO1 | GSTP1   | GSTT1    |
| GUSB    |        |        |       |       |         |          |

### H

|          |          |          |         |          |         |          |
|----------|----------|----------|---------|----------|---------|----------|
| H19      | HACL1    | HADH     | HAS3    | HAT1     | HCN4    | HDAC1    |
| HDAC2    | HDAC8    | HERPUD1  | HEXB    | HFE      | HGF     | HIF1A    |
| HIP1     | HLA-A    | HLA-B    | HLA-C   | HLA-DOA  | HLA-DOB | HLA-DPA1 |
| HLA-DPB1 | HLA-DQA1 | HLA-DQB1 | HLA-DRA | HLA-DRB1 | HLA-G   | HMGB1    |

|        |       |       |          |          |       |        |
|--------|-------|-------|----------|----------|-------|--------|
| HMGCR  | HNF4A | HNMT  | HNRNPUL1 | HOOK1    | HOOK3 | HOTAIR |
| HOTTIP | HPGDS | HRAS  | HSCB     | HSP90AA1 | HSPA5 | HSPA8  |
| HTR2A  | HTR2C | HTR3B | HYKK     |          |       |        |

I

|        |          |          |        |        |           |       |
|--------|----------|----------|--------|--------|-----------|-------|
| IDH1   | IDH1-AS1 | IDH2     | IFNG   | IFNL3  | IFNL4     | IGF1  |
| IGF1R  | IGF2     | IGF2BP2  | IGFBP3 | IL1B   | IL1RL1    | IL6R  |
| IL6ST  | IL7R     | IL13     | IL17F  | IL20RA | IL21R-AS1 | IL23R |
| IMPDH1 | INPP4B   | INS-IGF2 | IRS1   | ITGA2B | ITGA4     | ITGA5 |
| ITGAE  | ITGAV    | ITGAX    | ITGB1  | ITGB2  | ITGB2-AS1 | ITGB5 |
| ITPA   |          |          |        |        |           |       |

J

|      |      |      |      |       |  |  |
|------|------|------|------|-------|--|--|
| JAG1 | JAK1 | JAK2 | JAK3 | JMJD6 |  |  |
|------|------|------|------|-------|--|--|

K

|       |        |         |       |        |      |       |
|-------|--------|---------|-------|--------|------|-------|
| KARS  | KCNMB3 | KCNQ1   | KCNQ5 | KDM4D  | KDR  | KEAP1 |
| KIF5B | KIT    | KLC1    | KLC3  | KLHL12 | KLLN | KMT5A |
| KMT5B | KRAS   | KRT19P2 | KSR2  | KYAT1  |      |       |

L

|            |            |            |            |            |            |            |
|------------|------------|------------|------------|------------|------------|------------|
| LAMP3      | LANCL1     | LANCL1-AS1 | LARP1B     | LDHA       | LDHB       | LDLR       |
| LEP        | LEPR       | LGALS3BP   | LGR5       | LIG3       | LIG4       | LIN7A      |
| LINC00673  | LINC00704  | LIPF       | LMNA       | LOC286059  | LOC541472  | LOC553103  |
| LOC1001287 | LOC1001332 | LOC1005070 | LOC1005072 | LOC1005073 | LOC1009963 | LOC1019270 |
| 14         | 86         | 53         | 91         | 46         | 25         | 66         |
| LOC1019273 | LOC1019277 | LOC1019281 | LOC1019284 | LOC1019284 | LOC1019287 | LOC1019295 |
| 18         | 68         | 00         | 02         | 14         | 18         | 32         |
| LOC1019298 | LOC1027240 | LPL        | LRIG3      | LRP1B      | LRP2       | LRP5       |
| 29         | 50         |            |            |            |            |            |
| LRP6       | LRRC4C     | LRTM1      | LSM14A     | LTA4H      | LY86       | LY96       |

M

|         |         |         |         |           |         |         |
|---------|---------|---------|---------|-----------|---------|---------|
| MAD1L1  | MALAT1  | MALT1   | MAOB    | MAP2K1    | MAP2K2  | MAP3K1  |
| MAP3K5  | MAP3K7  | MAPK11  | MAPK14  | MCL1      | MDM2    | MDM4    |
| MECP2   | MEG3    | MEP1B   | MET     | METAP1    | MFSD11  | MGAM    |
| MGAT4A  | MGMT    | MICB    | MIEN1   | MIR27A    | MIR146A | MIR300  |
| MIR323B | MIR423  | MIR449B | MIR492  | MIR577    | MIR604  | MIR618  |
| MIR636  | MIR1206 | MIR1307 | MIR2053 | MIR3142HG | MIR3184 | MIR4673 |
| MIR4728 | MIR4761 | MIR6759 | MIR6891 | MISP      | MITD1   | MITF    |
| MKRN1   | MLH1    | MLLT3   | MMAB    | MME       | MMP8    | MMP13   |
| MPL     | MRM2    | MSH2    | MSH3    | MSN       | MST1R   | MTAP    |
| MTHFD1  | MTHFR   | MTOR    | MTR     | MTRR      | MUTYH   | MVK     |

|     |     |       |       |       |  |  |
|-----|-----|-------|-------|-------|--|--|
| MVP | MYC | MYD88 | MYLIP | MYO5A |  |  |
|-----|-----|-------|-------|-------|--|--|

**N**

|         |        |       |       |        |        |        |
|---------|--------|-------|-------|--------|--------|--------|
| NAGA    | NALCN  | NAMPT | NAT2  | NCAM2  | NCOA1  | NCOA4  |
| NEDD4   | NEU2   | NF1   | NF2   | NFASC  | NFATC2 | NLGN1  |
| NLGN4X  | NMRAL1 | NOD2  | NOS3  | NOTCH1 | NOTCH2 | NPAT   |
| NPC1    | NPM1   | NQO1  | NQO2  | NR1I2  | NR1I3  | NR3C1  |
| NR3C2   | NRAS   | NRG1  | NSD1  | NSRP1  | NT5C2  | NT5C3A |
| NT5E    | NTHL1  | NTRK1 | NTRK3 | NUDC   | NUDT2  | NUDT15 |
| NUP210L |        |       |       |        |        |        |

**O**

|      |      |       |       |       |      |  |
|------|------|-------|-------|-------|------|--|
| OASL | OGG1 | OPRD1 | OPRM1 | OR4D6 | OTOS |  |
|------|------|-------|-------|-------|------|--|

**P**

|           |          |        |        |            |         |        |
|-----------|----------|--------|--------|------------|---------|--------|
| PACERR    | PACSIN2  | PAGR1  | PAH    | PAK1       | PALB2   | PAPD7  |
| PARD3B    | PARPBP   | PAX5   | PBRM1  | PC         | PCK1    | PCM1   |
| PDCD1     | PDE4B    | PDE5A  | PDE10A | PDGFB      | PDGFRA  | PDGFRB |
| PDK3      | PDPK1    | PDXK   | PDZRN3 | PFKFB3     | PGAP3   | PGBD3  |
| PGR       | PHF8     | PHKG2  | PIGF   | PIK3CA     | PIK3CB  | PIK3R1 |
| PIK3R2    | PIM1     | PINLYP | PKD1   | PLA2G7     | PLAU    | PLCB1  |
| PLCB3     | PLCG2    | PLG    | PLXNC1 | PMF1-BGLAP | PMM2    | PNMT   |
| PNP       | POFUT2   | POLA2  | POLE   | POLK       | POLR2F  | PON1   |
| POR       | POU3F2   | PPARA  | PPARD  | PPARG      | PPFIBP1 | PPIF   |
| PPIP5K2   | PPP1R13L | PRB2   | PRCP   | PRDX4      | PREP    | PRKAA2 |
| PRKAR1A   | PRKCH    | PRKCI  | PRKG1  | PROM1      | PSMA8   | PTCH1  |
| PTCHD1-AS | PTEN     | PTGES  | PTGR1  | PTGS2      | PTH     | PTH1R  |
| PTK2      | PTPN1    | PTPN23 | PTPRG  | PTPRK      | PTPRM   | PTRH2  |
| PUS1      | PVT1     | PWWP2A | PYGL   | PYGM       |         |        |

**R**

|        |        |         |         |        |       |        |
|--------|--------|---------|---------|--------|-------|--------|
| RAB3D  | RAC1   | RAC2    | RAD50   | RAD51C | RAD52 | RAF1   |
| RALBP1 | RANBP2 | RAPGEF5 | RARB    | RARG   | RARS  | RAVER2 |
| RB1    | RBFOX1 | RBP2    | RBP4    | REN    | RET   | REV1   |
| REV3L  | RFK    | RGS5    | RHOQ    | RICTOR | RIPK2 | RNASE2 |
| RNF43  | RNF128 | RNF130  | RNU5F-1 | RORC   | ROS1  | RRAS2  |
| RRM1   | RRM2   | RUNDC3B | RXRA    |        |       |        |

**S**

|          |          |        |        |          |          |          |
|----------|----------|--------|--------|----------|----------|----------|
| SCARB1   | SCN1A    | SCN10A | SCO2   | SDC4     | SDCBP    | SEC16A   |
| SEC31A   | SELE     | SELL   | SEMA3C | SERPINA3 | SERPINA6 | SERPINA7 |
| SERPINE1 | SERPING1 | SETD2  | SETD3  | SETD6    | SF3B1    | SFXN4    |
| SH2B3    | SH2D5    | SHMT1  | SHTN1  | SIGLEC7  | SIRPA    | SIRT2    |

|          |            |          |          |         |         |          |
|----------|------------|----------|----------|---------|---------|----------|
| SLC1A1   | SLC2A1-AS1 | SLC3A2   | SLC6A4   | SLC7A5  | SLC10A2 | SLC15A1  |
| SLC19A1  | SLC22A1    | SLC22A2  | SLC22A4  | SLC22A5 | SLC22A7 | SLC22A12 |
| SLC22A16 | SLC25A13   | SLC28A1  | SLC28A2  | SLC28A3 | SLC29A1 | SLC31A1  |
| SLC34A2  | SLC37A1    | SLC45A3  | SLCO1A2  | SLCO1B1 | SLCO1B3 | SLCO4C1  |
| SMARCA1  | SMARCA4    | SMARCAD1 | SMARCB1  | SMO     | SMS     | SMYD2    |
| SMYD3    | SNAPC5     | SND1     | SNRNP200 | SOCS1   | SOD2    | SOD3     |
| SOX10    | SPARC      | SPG7     | SPIDR    | SPON1   | SQSTM1  | SRC      |
| SRGAP3   | SRSF2      | SRXN1    | SSBP2    | ST14    | STAG2   | STIM1    |
| STK11    | STRADA     | STRN     | STS      | SULT1A1 | SULT1C4 | SULT1E1  |
| SULT2B1  | SUV39H2    | SUZ12    | SVIL     | SVOP    | SYK     | SYN1     |
| SYNE1    |            |          |          |         |         |          |

### T

|         |         |       |         |           |           |            |
|---------|---------|-------|---------|-----------|-----------|------------|
| TAB1    | TACC3   | TANC1 | TAS2R16 | TBC1D1    | TBC1D20   | TCN1       |
| TDP1    | TEK     | TENM1 | TF      | TFG       | TGFB1     | TGM2       |
| TH2LCRR | THRA    | THRB  | TIMM23B | TKT       | TLR2      | TLR3       |
| TLR4    | TLR7    | TLR9  | TMPRSS2 | TNFRSF10B | TNFRSF11A | TNFRSF11B  |
| TNFSF11 | TNFSF14 | TNIP1 | TNNC1   | TNRC6A    | TNRC6B    | TOMM40L    |
| TOP1    | TOP2A   | TOP2B | TP53    | TPBG      | TPH2      | TPM3       |
| TPM4    | TPMT    | TPP1  | TRIM24  | TRIM27    | TRIM33    | TRMT61B    |
| TRPV4   | TSC1    | TSC2  | TSG1    | TSHR      | TSPAN31   | TSPAP1-AS1 |
| TTC6    | TTK     | TTR   | TUBB1   | TUBB2A    | TXNRD2    | TYMP       |
| TYMS    | TYMSOS  | TYW3  |         |           |           |            |

### U

|         |         |         |        |        |        |        |
|---------|---------|---------|--------|--------|--------|--------|
| U2AF1   | U2AF1L5 | UBASH3B | UBC    | UBE2D1 | UBE2I  | UGT1A1 |
| UGT1A3  | UGT1A4  | UGT1A5  | UGT1A6 | UGT1A7 | UGT1A8 | UGT1A9 |
| UGT1A10 | UGT2B7  | UGT8    | ULBP3  | ULK3   | ULK4   | UMPS   |
| UPB1    | UPP1    | USMG5   | USP6   | UTY    |        |        |

### V

|        |     |        |     |       |       |     |
|--------|-----|--------|-----|-------|-------|-----|
| VAC14  | VCL | VCPKMT | VDR | VEGFA | VEGFC | VHL |
| VKORC1 | VWF |        |     |       |       |     |

### W

|      |      |      |        |      |  |  |
|------|------|------|--------|------|--|--|
| WAPL | WARS | WDR7 | WRAP53 | WWOX |  |  |
|------|------|------|--------|------|--|--|

### X

|       |     |     |      |       |       |       |
|-------|-----|-----|------|-------|-------|-------|
| XDH   | XPA | XPC | XPO5 | XRCC1 | XRCC3 | XRCC4 |
| XRCC5 |     |     |      |       |       |       |

Z

---

|       |         |        |        |        |        |       |
|-------|---------|--------|--------|--------|--------|-------|
| ZADH2 | ZBTB17  | ZCCHC6 | ZNF276 | ZNF397 | ZNF423 | ZNRF3 |
| ZPR1  | ZSCAN30 |        |        |        |        |       |

---

|                                     |    | TMB, median (range), mutations/Mb | P value | TMB level   |                      | P value |
|-------------------------------------|----|-----------------------------------|---------|-------------|----------------------|---------|
|                                     |    |                                   |         | Low (%)     | Moderate to high (%) |         |
| Age, median (range), years          |    |                                   | 0.37    |             |                      | 0.61    |
| <40                                 | 14 | 0 (0-4.80)                        |         | 13 (92.86%) | 1 (7.14%)            |         |
| 40-49                               | 26 | 2.01 (0-13.7965)                  |         | 20 (76.92%) | 6 (23.08%)           |         |
| 50-59                               | 43 | 0.37 (0-41.45)                    |         | 36 (83.72%) | 7 (16.28%)           |         |
| >=60                                | 34 | 0.52 (0-22.26)                    |         | 27 (79.41%) | 7 (20.59%)           |         |
| Tissue types (in each cancer types) |    |                                   |         |             |                      |         |
| Ovarian cancer                      |    |                                   | -       |             |                      | -       |
| Serous adenocarcinoma               | 59 | 0.36 (0-22.26)                    |         | 51 (86.44%) | 8 (13.56%)           |         |
| Clear cell adenocarcinoma           | 3  | 0.38 (0-3.20)                     |         | 3 (100%)    | 0 (0%)               |         |
| Endometrioid adenocarcinoma         | 1  | 0                                 |         | 1 (100%)    | 0 (0%)               |         |
| Other                               | 5  | 0 (0-2.30)                        |         | 5 (100%)    | 0 (0%)               |         |
| Cervical cancer                     |    |                                   | -       |             |                      | -       |
| Squamous cell carcinoma             | 31 | 0.99 (0-40.81)                    |         | 22 (70.97%) | 9 (29.03%)           |         |
| Mucinous adenocarcinoma             | 1  | 0                                 |         | 1 (100%)    | 0 (0%)               |         |
| Endometrial cancer                  |    |                                   | -       |             |                      | -       |
| Endometrioid adenocarcinoma         | 16 | 2.30 (0-41.45)                    |         | 12 (75%)    | 4 (25%)              |         |
| Serous adenocarcinoma               | 1  | 0.95                              |         | 1 (100%)    | 0 (0%)               |         |

Supplemental Table S2. The association of TMB and clinical status.



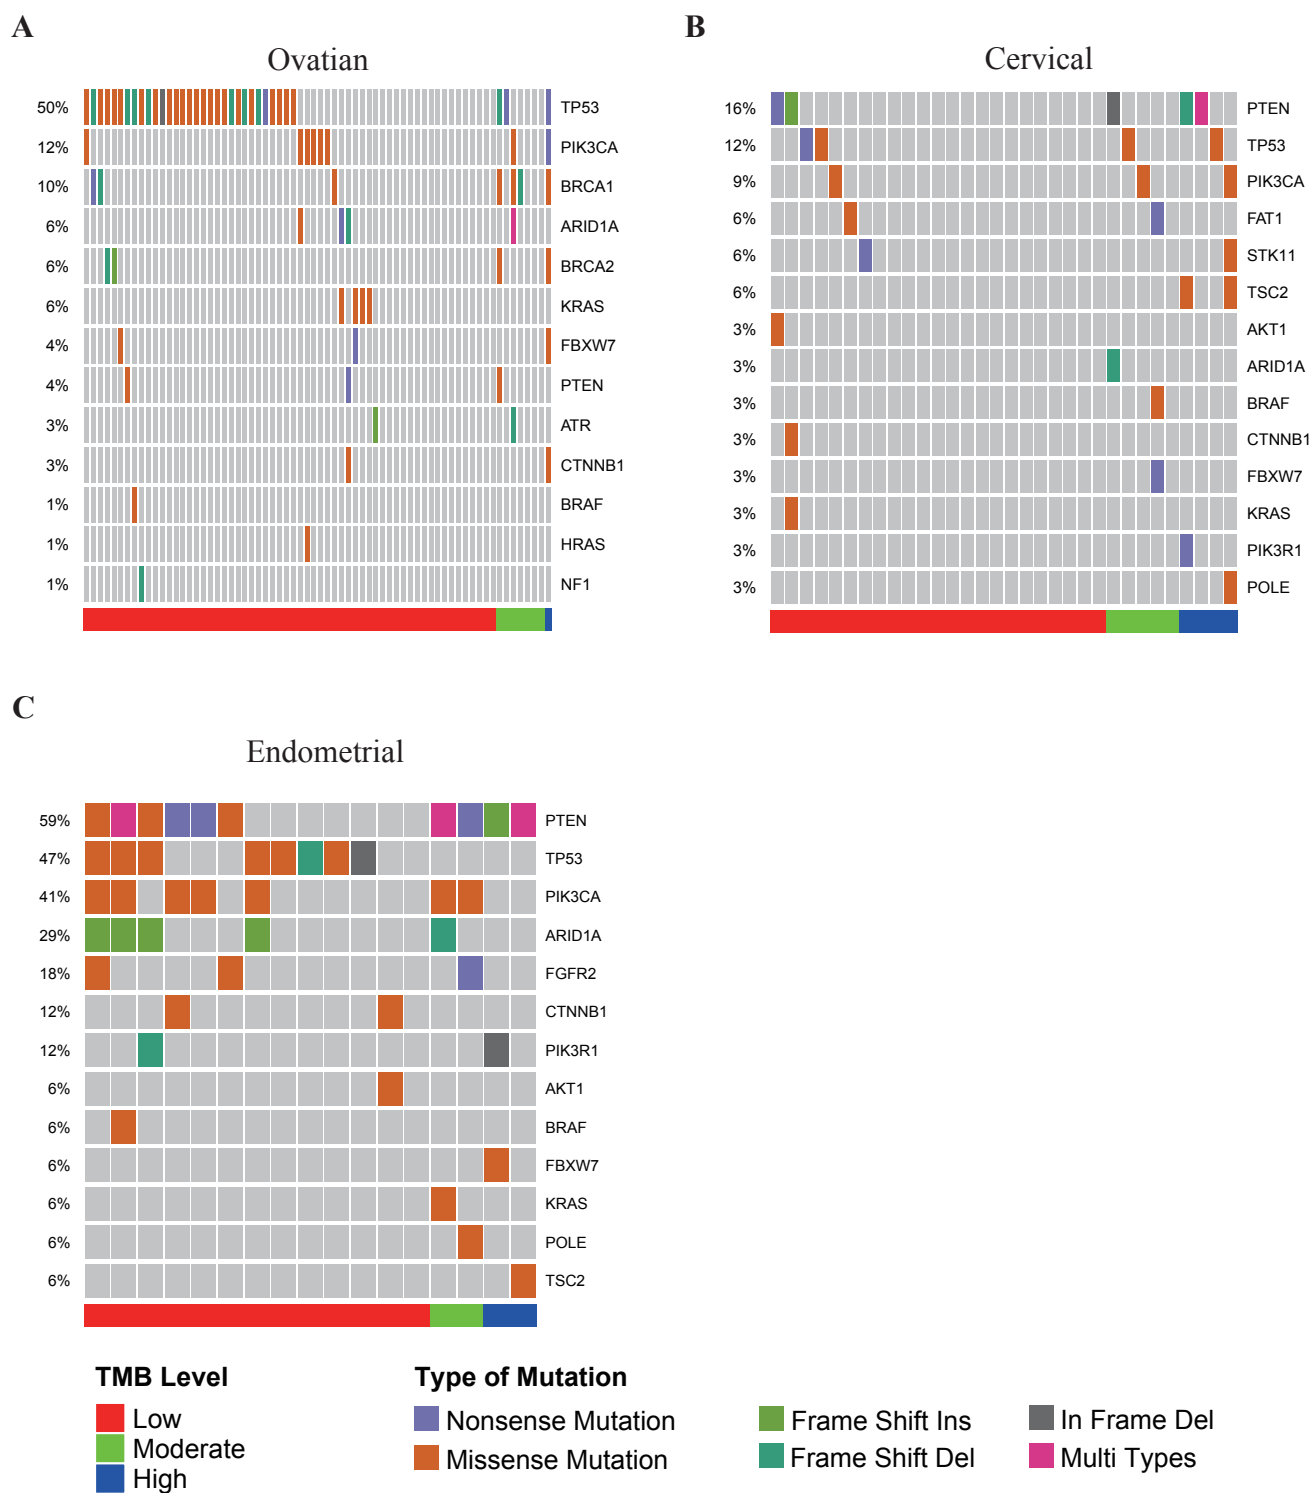

Supplemental Figure S1. Association of mutations in cancer genes with TMB in each cancer type. Association of mutations in cancer genes with TMB in ovarian cancer (a), cervical cancer (b), and endometrial cancer (c).
